# Supplementary material for: Developing and validating prediction models for severe exacerbations and readmissions in patients hospitalised for COPD exacerbation (SERCO) in China: a prospective observational study
Source: PubMed Central journal article supplement — BMJ Open Respir Res. 2024 May 7;11(1):e001881. doi: 10.1136/bmjresp-2023-001881 (PMC11086534; doi:10.1136/bmjresp-2023-001881), 2024-05-07
Supplement: bmjresp-2023-001881supp001.pdf [file bmjresp-2023-001881supp001.pdf]

## Developing and Validating Prediction Models for Severe Exacerbations and Readmissions in Patients Hospitalized for COPD Exacerbation (SERCO) in China: a Prospective Observational Study

### Supplemental table S1. Geographic regions division of provinces

| Region    | Province                                                           |
|-----------|--------------------------------------------------------------------|
| Northern  | Beijing, Tianjin, Hebei, Shanxi, and Inner Mongolia.               |
| Northeast | Heilongjiang, Jilin, and Liaoning.                                 |
| Eastern   | Shandong, Jiangsu, Shanghai, Zhejiang, Fujian, Anhui, and Jiangxi. |
| Southern  | Guangdong, Guangxi, and Hainan.                                    |
| Southwest | Sichuan, Yunnan, Guizhou, Chongqing, and Tibet.                    |
| Northwest | Xiangjiang, Gansu, Qinghai, Shannxi, and Ningxia.                  |
| Central   | Henan, Hunan, and Hubei.                                           |

### Supplemental table S2. Candidate predictor parameters for models

- Sociodemographic characteristics
  - ✓ Age
  - ✓ Gender
  - ✓ Education
- COPD-related disease history
  - ✓ Smoking status
  - ✓ Ever diagnosed for COPD
  - ✓ Frequency of hospitalizations for AECOPD in the past 12 months
  - ✓ Ever regularly treated with long-acting bronchodilators
  - ✓ Ever regularly treated with inhaled corticosteroids
  - ✓ Home oxygen therapy
  - ✓ Pulmonary rehabilitation
- Comorbidity & Complication
  - ✓ Respiratory failure
  - ✓ Chronic cor pulmonale
  - ✓ Pulmonary arterial hypertension
  - ✓ Pneumonia
  - ✓ Lung cancer
  - ✓ Asthma
  - ✓ Coronary heart disease
  - ✓ Hypertension
  - ✓ Diabetes
- Treatment during hospitalization
  - ✓ Systemic corticosteroids
  - ✓ Antibiotic
  - ✓ Inhaled short-acting bronchodilators
  - ✓ Methylxanthine

- ✓ Expectorant
- ✓ Oxygen therapy
- clinical characteristics
  - ✓ Postbronchodilator FEV<sub>1</sub>%pred
  - ✓ CAT score at admission
  - ✓ mMRC at admission
  - ✓ BMI

---

COPD=chronic obstructive pulmonary disease. AECOPD=acute exacerbations of chronic obstructive pulmonary disease. FEV<sub>1</sub>%pred=postbronchodilator percent predicted forced expiratory volume in 1 second. CAT= COPD assessment test. mMRC=modified British medical research council. BMI=body mass index.

**Supplemental table S3. P values of the interaction among the potential predictors**

|                                                                | Age   | Gender | Education | Smoking | Ever diagnosed for COPD | Frequency of hospitalizations for AECOPD in the past 12 months | Ever regularly treated with long-acting bronchodilators | Ever regularly treated with inhaled corticosteroids | Home oxygen therapy |
|----------------------------------------------------------------|-------|--------|-----------|---------|-------------------------|----------------------------------------------------------------|---------------------------------------------------------|-----------------------------------------------------|---------------------|
| Gender                                                         | 0.374 |        |           |         |                         |                                                                |                                                         |                                                     |                     |
| Education                                                      | 0.314 | 0.168  |           |         |                         |                                                                |                                                         |                                                     |                     |
| Smoking                                                        | 0.398 | 0.055  | 0.136     |         |                         |                                                                |                                                         |                                                     |                     |
| Ever diagnosed for COPD                                        | 0.789 | 0.654  | 0.195     | 0.164   |                         |                                                                |                                                         |                                                     |                     |
| Frequency of hospitalizations for AECOPD in the past 12 months | 0.518 | 0.081  | 0.653     | 0.062   | 0.107                   |                                                                |                                                         |                                                     |                     |
| Ever regularly treated with long-acting bronchodilators        | 0.817 | 0.505  | 0.244     | 0.857   | 0.625                   | 0.420                                                          |                                                         |                                                     |                     |
| Ever regularly treated with inhaled corticosteroids            | 0.604 | 0.061  | 0.115     | 0.526   | 0.957                   | 0.638                                                          | 0.667                                                   |                                                     |                     |
| Home oxygen therapy                                            | 0.242 | 0.418  | 0.285     | 0.153   | 0.590                   | 0.162                                                          | 0.149                                                   | 0.364                                               |                     |
| Pulmonary rehabilitation                                       | 0.585 | 0.378  | 0.369     | 0.487   | 0.870                   | 0.764                                                          | 0.276                                                   | 0.620                                               | 0.409               |
| Respiratory failure                                            | 0.835 | 0.492  | 0.683     | 0.450   | 0.150                   | 0.587                                                          | 0.396                                                   | 0.472                                               | 0.400               |
| Chronic cor pulmonale                                          | 0.179 | 0.157  | 0.676     | 0.351   | 0.034                   | 0.425                                                          | 0.108                                                   | 0.735                                               | 0.001               |
| Pulmonary arterial hypertension                                | 0.821 | 0.963  | 0.541     | 0.366   | 0.137                   | 0.354                                                          | 0.513                                                   | 0.926                                               | 0.123               |
| Pneumonia                                                      | 0.509 | 0.699  | 0.967     | 0.681   | 0.884                   | 0.583                                                          | 0.502                                                   | 0.281                                               | 0.611               |
| Lung cancer                                                    | 0.147 | 0.625  | 0.573     | 0.982   | 0.919                   | 0.624                                                          | 0.404                                                   | 0.970                                               | 0.369               |
| Asthma                                                         | 0.401 | 0.709  | 0.289     | 0.268   | 0.907                   | 0.600                                                          | 0.017                                                   | 0.336                                               | 0.347               |
| Coronary heart disease                                         | 0.791 | 0.650  | 0.637     | 0.563   | 0.204                   | 0.370                                                          | 0.110                                                   | 0.820                                               | 0.835               |
| Hypertension                                                   | 0.728 | 0.751  | 0.392     | 0.723   | 0.915                   | 0.390                                                          | 0.349                                                   | 0.942                                               | 0.890               |
| Diabetes                                                       | 0.335 | 0.826  | 0.373     | 0.752   | 0.086                   | 0.199                                                          | 0.682                                                   | 0.147                                               | 0.086               |

|                                                                       |       |       |       |       |       |       |       |       |       |
|-----------------------------------------------------------------------|-------|-------|-------|-------|-------|-------|-------|-------|-------|
| Systemic corticosteroids treatment during hospitalization             | 0.074 | 0.148 | 0.544 | 0.824 | 0.045 | 0.295 | 0.489 | 0.502 | 0.027 |
| Antibiotic treatment during hospitalization                           | 0.705 | 0.399 | 0.992 | 0.274 | 0.116 | 0.053 | 0.073 | 0.835 | 0.064 |
| Inhaled short-acting bronchodilators treatment during hospitalization | 0.611 | 0.450 | 0.492 | 0.626 | 0.253 | 0.778 | 0.799 | 0.483 | 0.064 |
| Methylxanthine treatment during hospitalization                       | 0.522 | 0.680 | 0.538 | 0.764 | 0.982 | 0.766 | 0.296 | 0.867 | 0.133 |
| Expectorant treatment during hospitalization                          | 0.400 | 0.364 | 0.224 | 0.429 | 0.491 | 0.543 | 0.503 | 0.993 | 0.874 |
| Oxygen therapy                                                        | 0.366 | 0.006 | 0.881 | 0.944 | 0.416 | 0.148 | 0.931 | 0.068 | 0.083 |
| Postbronchodilator FEV <sub>1</sub> %pred                             | 0.347 | 0.413 | 0.468 | 0.920 | 0.765 | 0.219 | 0.525 | 0.317 | 0.468 |
| CAT score at admission                                                | 0.616 | 0.817 | 0.962 | 0.901 | 0.792 | 0.495 | 0.826 | 0.274 | 0.051 |
| mMRC at admission                                                     | 0.554 | 0.381 | 0.999 | 0.516 | 0.982 | 0.205 | 0.686 | 0.755 | 0.002 |
| BMI                                                                   | 0.852 | 0.335 | 0.289 | 0.499 | 0.685 | 0.089 | 0.194 | 0.503 | 0.665 |

**Supplemental table S3. P values of the interaction among the potential predictors (Continued)**

|                                 | Pulmonary rehabilitation | Respiratory failure | Chronic cor pulmonale | Pulmonary arterial hypertension | Pneumonia | Lung cancer | Asthma | Coronary heart disease | Hypertension | Diabetes |
|---------------------------------|--------------------------|---------------------|-----------------------|---------------------------------|-----------|-------------|--------|------------------------|--------------|----------|
| Respiratory failure             | 0.743                    |                     |                       |                                 |           |             |        |                        |              |          |
| Chronic cor pulmonale           | 0.236                    | 0.997               |                       |                                 |           |             |        |                        |              |          |
| Pulmonary arterial hypertension | 0.038                    | 0.660               | 0.503                 |                                 |           |             |        |                        |              |          |
| Pneumonia                       | 0.076                    | 0.612               | 0.782                 | 0.879                           |           |             |        |                        |              |          |
| Lung cancer                     | 0.598                    | 0.897               | 0.763                 | 0.764                           | 0.314     |             |        |                        |              |          |
| Asthma                          | 0.819                    | 0.675               | 0.633                 | 0.581                           | 0.852     | 0.966       |        |                        |              |          |
| Coronary heart disease          | 0.957                    | 0.686               | 0.225                 | 0.460                           | 0.503     | 0.327       | 0.974  |                        |              |          |
| Hypertension                    | 0.710                    | 0.911               | 0.283                 | 0.162                           | 0.312     | 0.963       | 0.022  | 0.307                  |              |          |

|                                                                       |       |       |       |       |       |       |       |       |       |       |
|-----------------------------------------------------------------------|-------|-------|-------|-------|-------|-------|-------|-------|-------|-------|
| Diabetes                                                              | 0.348 | 0.044 | 0.149 | 0.148 | 0.641 | 0.088 | 0.194 | 0.501 | 0.299 |       |
| Systemic corticosteroids treatment during hospitalization             | 0.112 | 0.284 | 0.659 | 0.269 | 0.964 | 0.545 | 0.070 | 0.515 | 0.987 | 0.932 |
| Antibiotic treatment during hospitalization                           | 0.394 | 0.256 | 0.508 | 0.567 | 0.043 | 0.958 | 0.417 | 0.689 | 0.634 | 0.820 |
| Inhaled short-acting bronchodilators treatment during hospitalization | 0.709 | 0.123 | 0.052 | 0.711 | 0.105 | 0.601 | 0.082 | 0.268 | 0.461 | 0.033 |
| Methylxanthine treatment during hospitalization                       | 0.686 | 0.764 | 0.660 | 0.981 | 0.454 | 0.960 | 0.371 | 0.182 | 0.784 | 0.242 |
| Expectorant treatment during hospitalization                          | 0.274 | 0.110 | 0.011 | 0.113 | 0.906 | 0.958 | 0.114 | 0.543 | 0.832 | 0.980 |
| Oxygen therapy                                                        | 0.050 | 0.001 | 0.088 | 0.320 | 0.685 | 0.966 | 0.170 | 0.479 | 0.305 | 0.643 |
| Postbronchodilator FEV <sub>1</sub> %pred                             | 0.708 | 0.093 | 0.073 | 0.138 | 0.165 | 0.458 | 0.289 | 0.558 | 0.869 | 0.078 |
| CAT score at admission                                                | 0.098 | 0.401 | 0.257 | 0.892 | 0.625 | 0.382 | 0.246 | 0.635 | 0.137 | 0.071 |
| mMRC at admission                                                     | 0.008 | 0.729 | 0.750 | 0.026 | 0.819 | 0.766 | 0.822 | 0.362 | 0.948 | 0.461 |
| BMI                                                                   | 0.215 | 0.933 | 0.734 | 0.450 | 0.703 | 0.275 | 0.016 | 0.053 | 0.524 | 0.909 |

Supplemental table S3. P values of the interaction among the potential predictors (Continued)

|                                                                       | Systemic corticosteroids treatment during hospitalization | Antibiotic treatment during hospitalization | Inhaled short-acting bronchodilators treatment during hospitalization | Methylxanthine treatment during hospitalization | Expectorant treatment during hospitalization | Oxygen therapy | FEV <sub>1</sub> %pred | CAT score at admission | mMRC at admission |
|-----------------------------------------------------------------------|-----------------------------------------------------------|---------------------------------------------|-----------------------------------------------------------------------|-------------------------------------------------|----------------------------------------------|----------------|------------------------|------------------------|-------------------|
| Antibiotic treatment during hospitalization                           | 0.393                                                     |                                             |                                                                       |                                                 |                                              |                |                        |                        |                   |
| Inhaled short-acting bronchodilators treatment during hospitalization | 0.182                                                     | 0.151                                       |                                                                       |                                                 |                                              |                |                        |                        |                   |
| Methylxanthine treatment during hospitalization                       | 0.909                                                     | 0.655                                       | 0.672                                                                 |                                                 |                                              |                |                        |                        |                   |
| Expectorant treatment during hospitalization                          | 0.113                                                     | 0.336                                       | 0.005                                                                 | 0.050                                           |                                              |                |                        |                        |                   |

|                                           |       |       |       |       |       |       |       |       |       |
|-------------------------------------------|-------|-------|-------|-------|-------|-------|-------|-------|-------|
| Oxygen therapy                            | 0.605 | 0.053 | 0.441 | 0.721 | 0.719 |       |       |       |       |
| Postbronchodilator FEV <sub>1</sub> %pred | 0.330 | 0.063 | 0.308 | 0.072 | 0.599 | 0.100 |       |       |       |
| CAT score at admission                    | 0.784 | 0.428 | 0.232 | 0.338 | 0.810 | 0.651 | 0.386 |       |       |
| mMRC at admission                         | 0.382 | 0.952 | 0.846 | 0.676 | 0.215 | 0.112 | 0.704 | 0.205 |       |
| BMI                                       | 0.133 | 0.411 | 0.104 | 0.421 | 0.611 | 0.861 | 0.087 | 0.237 | 0.489 |

COPD= chronic obstructive pulmonary disease. AECOPD=acute exacerbations of chronic obstructive pulmonary disease. FEV<sub>1</sub>%pred= percent predicted forced expiratory volume in 1 second. CAT= COPD assessment test. mMRC= modified British medical research council. BMI= body mass index.

**Supplemental table S4. Coefficients and P values of candidate predictor in the full model**

| Candidate predictor parameters                                   | Coefficient | P-value |
|------------------------------------------------------------------|-------------|---------|
| Age                                                              | -0.002      | 0.837   |
| Gender                                                           | 0.074       | 0.829   |
| Education                                                        | 0.528       | 0.001   |
| Smoking status                                                   | -0.333      | 0.080   |
| Ever diagnosed for COPD                                          | 0.846       | 0.002   |
| Frequency of hospitalizations for AECOPD in the past 12 months   | 0.182       | 0.002   |
| Ever regularly treated with long-acting bronchodilators          | 0.418       | 0.024   |
| Ever regularly treated with inhaled corticosteroids              | 0.290       | 0.343   |
| Home oxygen therapy                                              | 0.584       | 0.398   |
| Pulmonary rehabilitation                                         | -0.278      | 0.756   |
| Respiratory failure                                              | 0.379       | 0.282   |
| Chronic cor pulmonale                                            | 1.081       | 0.009   |
| Pulmonary arterial hypertension                                  | -14.141     | 0.973   |
| Pneumonia                                                        | -0.278      | 0.698   |
| Lung cancer                                                      | -0.057      | 0.924   |
| Asthma                                                           | -0.900      | 0.514   |
| Coronary heart disease                                           | 0.227       | 0.204   |
| Hypertension                                                     | -0.126      | 0.475   |
| Diabetes                                                         | -0.755      | 0.163   |
| Systemic corticosteroids treatment                               | 0.567       | 0.089   |
| Antibiotic treatment                                             | 0.120       | 0.770   |
| Inhaled short-acting bronchodilators treatment                   | -0.340      | 0.093   |
| Methylxanthine treatment                                         | 0.919       | <0.001  |
| Expectorant treatment                                            | 0.689       | 0.032   |
| Oxygen therapy                                                   | 0.146       | 0.527   |
| GOLD 2                                                           | 1.133       | 0.017   |
| GOLD 3                                                           | 0.942       | 0.046   |
| GOLD 4                                                           | 1.136       | 0.019   |
| CAT score at admission                                           | -0.018      | 0.132   |
| mMRC at admission                                                | 0.064       | 0.540   |
| BMI                                                              | -0.054      | 0.022   |
| Ever diagnosed for COPD * Chronic cor pulmonale                  | -0.552      | 0.195   |
| Home oxygen therapy * Chronic cor pulmonale                      | -0.351      | 0.393   |
| Pulmonary rehabilitation * Pulmonary arterial hypertension       | -0.781      | 0.473   |
| Ever regularly treated with long-acting bronchodilators * Asthma | 0.478       | 0.300   |
| Asthma * Hypertension                                            | 0.810       | 0.078   |
| Respiratory failure * Diabetes                                   | 0.121       | 0.826   |
| Ever diagnosed for COPD * Systemic corticosteroids treatment     | -0.628      | 0.100   |
| Home oxygen therapy * Systemic corticosteroids treatment         | -0.486      | 0.232   |
| Pneumonia * Antibiotic treatment                                 | 0.273       | 0.710   |
| Diabetes * Inhaled short-acting bronchodilators treatment        | 1.345       | 0.020   |

|                                                                        |        |       |
|------------------------------------------------------------------------|--------|-------|
| Chronic cor pulmonale * Expectorant treatment                          | 0.789  | 0.020 |
| Inhaled short-acting bronchodilators treatment * Expectorant treatment | -0.629 | 0.069 |
| Gender * Home oxygen therapy                                           | -0.384 | 0.331 |
| Pulmonary rehabilitation * Home oxygen therapy                         | 0.998  | 0.216 |
| Respiratory failure * Home oxygen therapy                              | -0.909 | 0.020 |
| Home oxygen therapy * mMRC at admission                                | 0.513  | 0.305 |
| Pulmonary rehabilitation * mMRC at admission                           | -0.372 | 0.106 |
| Pulmonary arterial hypertension * mMRC at admission                    | 12.828 | 0.381 |
| BMI * Asthma                                                           | 0.024  | 0.682 |

COPD=chronic obstructive pulmonary disease. AECOPD=acute exacerbations of chronic obstructive pulmonary disease. GOLD=global initiative for chronic obstructive lung disease. CAT= COPD assessment test. mMRC=modified British medical research council. BMI=body mass index.

**Supplemental table S5. Cutoff of predicted risk, sensitivity, specificity, positive predictive value, and negative predictive value of SERCO model**

|                                  | Cutoff (%) | Sensitivity | Specificity | Positive predictive value | Negative predictive value |
|----------------------------------|------------|-------------|-------------|---------------------------|---------------------------|
| <b>Severe exacerbation</b>       |            |             |             |                           |                           |
| 1-month                          | 1.8        | 0.767       | 0.565       | 0.039                     | 0.990                     |
| 6-month                          | 9.2        | 0.630       | 0.685       | 0.131                     | 0.961                     |
| 12-month                         | 16.0       | 0.600       | 0.693       | 0.171                     | 0.942                     |
| <b>COPD-specific readmission</b> |            |             |             |                           |                           |
| 1-month                          | 1.8        | 0.694       | 0.635       | 0.039                     | 0.990                     |
| 6-month                          | 8.0        | 0.645       | 0.652       | 0.119                     | 0.961                     |
| 12-month                         | 15.9       | 0.586       | 0.706       | 0.171                     | 0.943                     |

COPD=chronic obstructive pulmonary disease.



**Table S6. Slope and intercept of the calibration in external validation cohort before and after adjustment**

|                                  | Before slope and intercept adjustment |                         | After slope and intercept adjustment |                         |
|----------------------------------|---------------------------------------|-------------------------|--------------------------------------|-------------------------|
|                                  | Slope                                 | Intercept               | Slope                                | Intercept               |
| <b>Severe exacerbation</b>       |                                       |                         |                                      |                         |
| 1-month                          | 0.526 (-0.058 to 1.110)               | 0.011 (-0.011 to 0.033) | 0.676 (-0.116 to 1.468)              | 0.010 (-0.013 to 0.033) |
| 6-month                          | 0.359 (-0.068 to 0.787)               | 0.045 (-0.015 to 0.105) | 0.429 (-0.058 to 0.915)              | 0.045 (-0.012 to 0.102) |
| 12-month                         | 0.309 (-0.112 to 0.736)               | 0.069 (-0.023 to 0.161) | 0.427 (-0.123 to 0.977)              | 0.056 (-0.044 to 0.156) |
| <b>COPD-specific readmission</b> |                                       |                         |                                      |                         |
| 1-month                          | 0.541 (-0.148 to 1.230)               | 0.012 (-0.012 to 0.035) | 0.675 (-0.134 to 1.484)              | 0.012 (-0.010 to 0.033) |
| 6-month                          | 0.345 (-0.138 to 0.829)               | 0.047 (-0.018 to 0.112) | 0.385 (-0.140 to 0.909)              | 0.050 (-0.012 to 0.110) |
| 12-month                         | 0.328 (-0.073 to 0.728)               | 0.067 (-0.017 to 0.151) | 0.437 (-0.063 to 0.938)              | 0.056 (-0.034 to 0.148) |

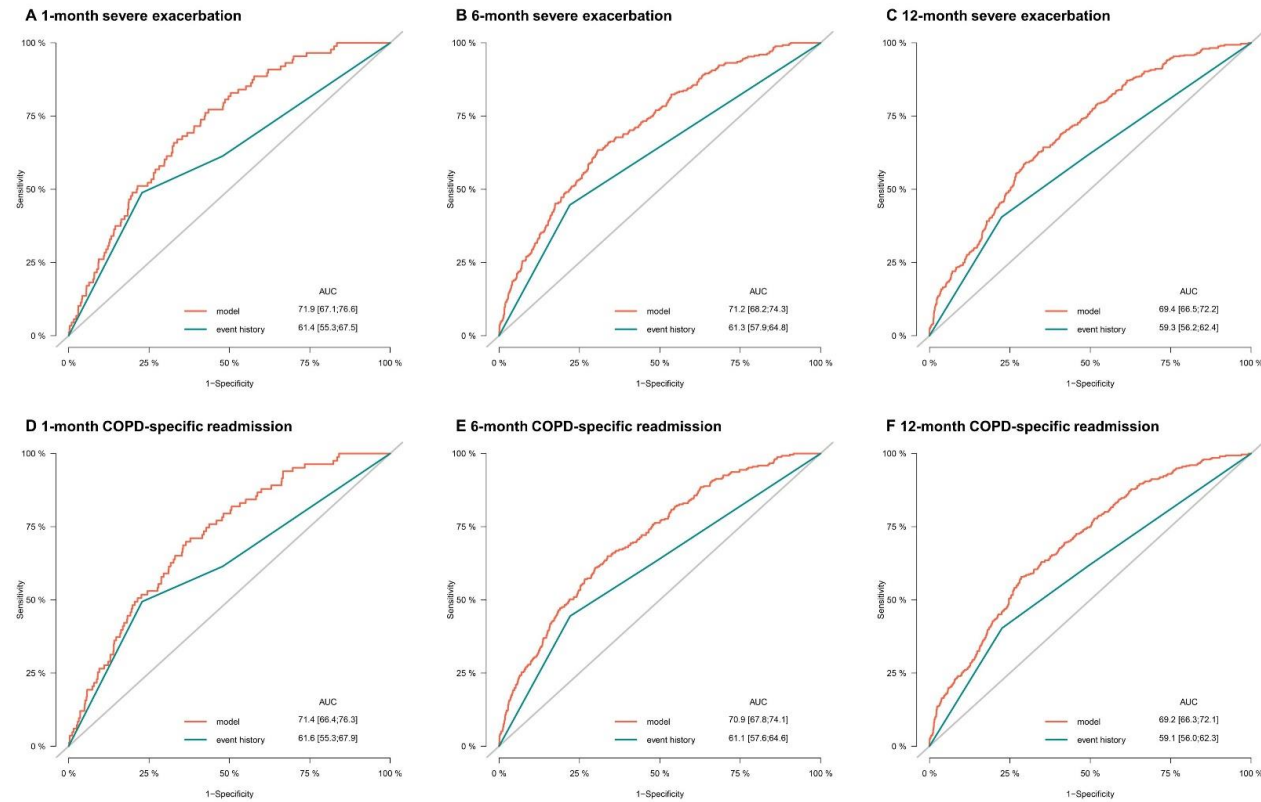

### Supplemental figure S1. Discriminative ability of prediction model compared with event history

Receiver operating characteristic (ROC) curves and area-under-the-curve (AUC) of the prediction models for predicting the probability of severe exacerbation at 1 month (A), 6 months (B), and 12 months (C), and COPD-specific readmission (D, E, and F) compared with event history. Event history was the history of severe exacerbations in the past 12 months. COPD=chronic obstructive pulmonary disease.

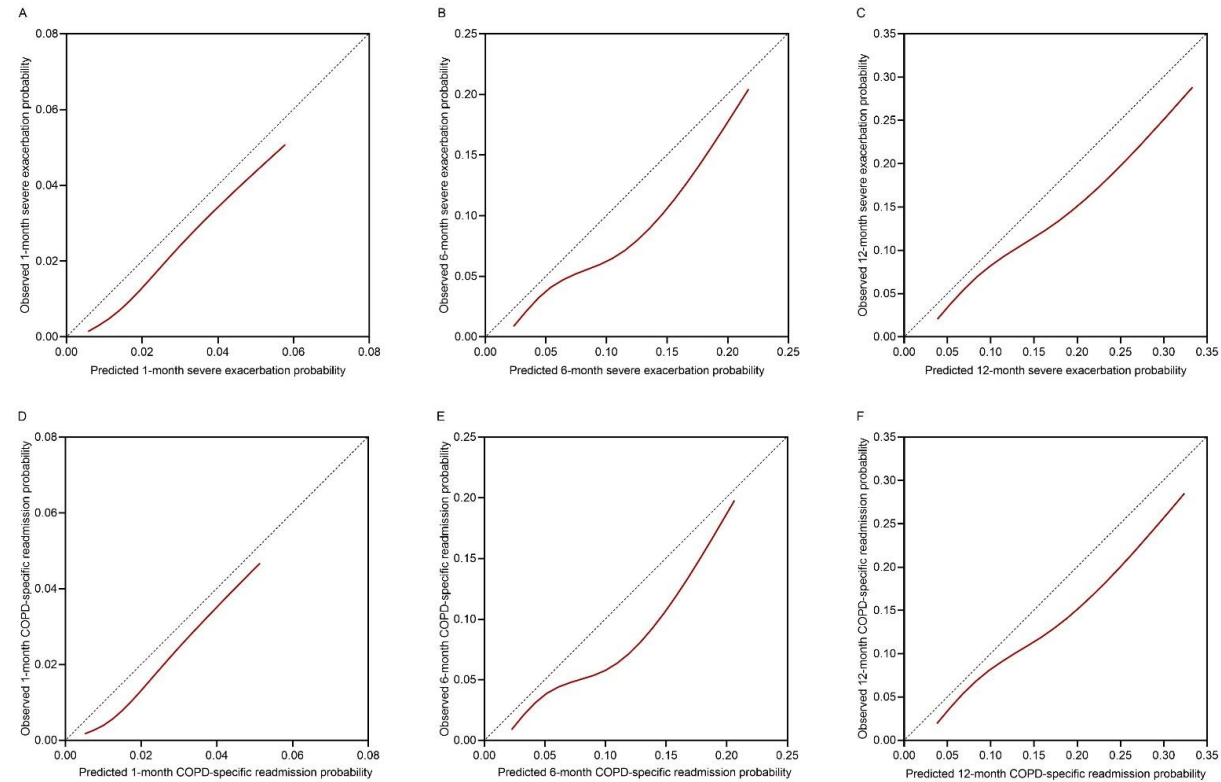

**Supplemental figure S2. Calibration plots of observed and predicted probability in the internal validation cohort before slope and intercept adjustment**

Calibration plot comparing per quintile average predicted and observed probability of severe exacerbation at 1 month (A), 6 months (B), and 12 months (C), and COPD-specific readmission (D, E, and F). Perfect agreement is shown by the black dashed line. Error bars represent 95% CI.

COPD=chronic obstructive pulmonary disease. CI= confidential interval.

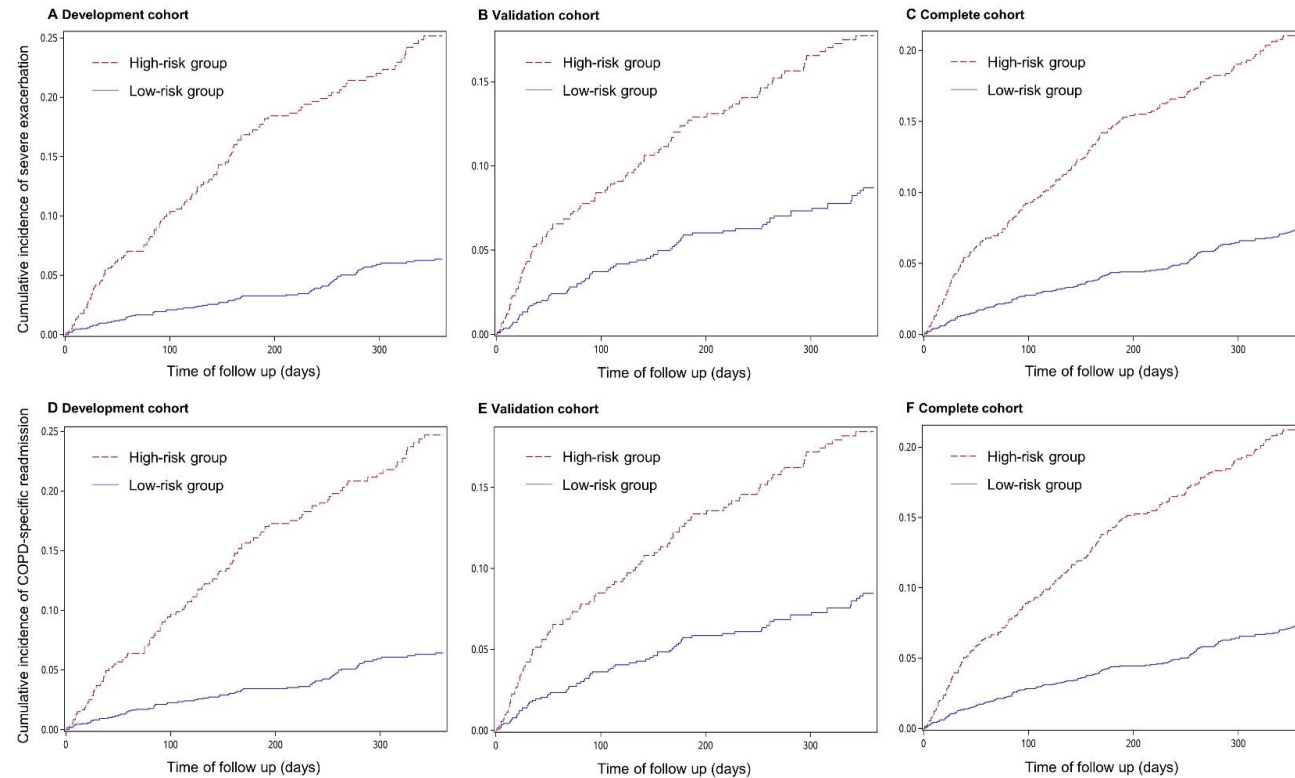

### Supplemental figure S3. Cumulative incidence by risk groups

Cumulative incidence curves for severe exacerbation in development cohort (A), validation cohort (B), and complete set (C), and COPD-specific readmission (D, E, and F) by risk groups. Participants were stratified into high-risk and low-risk groups by the model-predicted probability of 12-month severe exacerbation and COPD-specific readmission with the cutoff point at 16%.

COPD=chronic obstructive pulmonary disease.
